# Supplementary material for: Study protocol for a phase II dose evaluation randomized controlled trial of cholecalciferol in critically ill children with vitamin D deficiency (VITdAL-PICU study)
Source: PubMed Central journal article supplement (PMC5721544; doi:10.1186/s40814-017-0214-z), 2017-12-08
Supplement: 40814_2017_214_MOESM2_ESM.pdf [file 40814_2017_214_MOESM2_ESM.pdf]

2015 - 2016

# Certificate of Proficiency

This is to certify that

*Room R4013  
Childrens Hospital of Eastern Ontario  
401 Smyth Road  
Ottawa ON K1H 8L1*

has participated in the international  
25 Hydroxyvitamin D EQAS  
and has met the performance target\*  
set by the DEQAS Advisory Panel

\* 75% or more results fell within  $\pm 25\%$  of the Target Value

#### **Advisory Panel**

Jacqueline Berry · Ramon A. Durazo-Arvizu  
Elaine Gunter · Glenville Jones · Hugh Makin  
Karen Phinney · Christopher Sempos

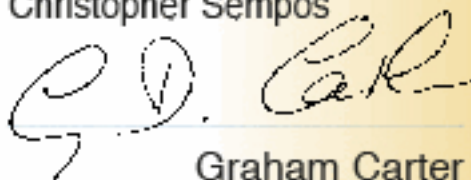

Graham Carter  
DEQAS Organiser

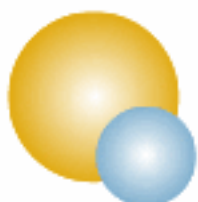

VITAMIN D EXTERNAL QUALITY ASSESSMENT SCHEME

D

M

Q

A

S
